# Supplementary material for: In vivo imaging with a water immersion objective affects brain temperature, blood flow and oxygenation
Source: eLife journal article supplement (doi:10.7554/elife.47324), 2019-08-09
Supplement: supp [file elife-47324-supp-v1.zip]

Archive with 6 entries (6 files):
- elife_poa_e47324_Figure1_figure_supplement_1.pdf
- elife_poa_e47324_Figure_4_source_data_1.xlsx
- elife_poa_e47324_Figure_3_source_data_2.xlsx
- elife_poa_e47324_Figure_3_source_data_1.xlsx
- elife_poa_e47324_Figure_1_source_data_1.xlsx
- elife_poa_e47324_Transparent_Reporting_File.docx
