# Supplementary material for: In vivo imaging with a water immersion objective affects brain temperature, blood flow and oxygenation
Source: eLife journal article supplement (doi:10.7554/elife.47324), 2019-08-09
Supplement: supp [file elife-47324-supp-v1.zip › elife_poa_e47324_Figure_1_source_data_1.xlsx]

## Sheet: Figure1
	aw surface air	aw surface water	aw surface heat	aw brain air	aw brain water	aw brain heat	kd surface air	kd surface water	kd surface heat	kd brain air	kd brain water	kd brain heat
S13	33.6	33.1	36	36.15	34	36.1	33.4	31.8	36.2	33.9	32	36
S12	35.7	33.8	36.8	36.8	35	37.1	32.7	31.5	36	34.2	32.5	34.5
S9	35.8	34	37.5	37.25	34.8	37.5	32.8	32.25	36.15	34	32.4	35.8
S8	34.8	32.9	36	36.8	34.2	36.2	33.6	31.5	36	35.45	32.1	36
S11	36.15	32.5	36.2	37	33.9	36.3	34.8	32	36	35.8	33.2	36.4
moyennes	35.21	33.26	36.5	36.8	34.38	36.64	33.46	31.81	36.07	34.67	32.44	35.74
sem	0.411437	0.250759	0.25923	0.163095	0.196774	0.249159	0.336571	0.129923	0.0389872	0.354852	0.188892	0.290654
std	0.92	0.560714	0.579655	0.364692	0.44	0.557136	0.752596	0.290517	0.087178	0.793473	0.422374	0.649923
wilcoxson signed rank test (p)
tests / aw air		<0.001	<0.001		<0.001	>0.2	<0.001			<0.001
tests / aw water	<0.001		<0.001	<0.001		<0.001		<0.001			<0.001
tests / aw heat	<0.001	<0.001		>0.2	<0.001				>0.2			0.1 <P<0.2
tests / kd air	<0.001			<0.001				<0.001	<0.001		<0.001	<0.001
tests / kd water		<0.001			<0.001		<0.001		<0.001	<0.001		<0.001
tests / kd heat			>0.2			0.1 <P<0.2	<0.001	<0.001		<0.001	<0.001
