# Supplementary material for: In vivo imaging with a water immersion objective affects brain temperature, blood flow and oxygenation
Source: eLife journal article supplement (doi:10.7554/elife.47324), 2019-08-09
Supplement: supp [file elife-47324-supp-v1.zip › elife_poa_e47324_Figure_3_source_data_1.xlsx]

## Sheet: Figure3_a_b__awake_glass_window
		figure 3 a-b
		AWAKE: glass window
		po2
		mice_name	experiment	capillary	po2 RBC_air	po2 inter_air	po2mean_air	po2 RBC_water	po2 inter_water	po2mean_water	po2RBC_warm	po2 inter_warm	po2 mean_warm
		1)mice_Rav	experiment 1	cap21	77	36	61	66	24	48	60	30	48
			experiment 2	cap19	51	22	29	55	22	32	59	32	40
				cap20	49	22	28	39	21	24	50	31	39
		2)mice_ S18	experiment 1	cap17	53	27	36	52	19	26	69	28	42
				cap18	45	28	37	46	15	28	51	23	35
		3)mice_ S19	experiment 1	cap25	52	34	44	39	32	35	42	36	39
		4)mice_Thy neg	experiment 1	capB	83	47	68	57	34	46	77	50	67
			experiment 2	capF	50	30	37	40	22	28	54	32	38
		SO2
		mice_name	experiment	capillary	saturation_air	saturation_water	saturation_warm
		1)mice_Rav	experiment 1	cap21	84.5	77.9	70.9
			experiment 2	cap19	65	69.3	70.5
				cap20	62.5	45	63
		2)mice_ S18	experiment 1	cap17	68.2	67	82
				cap18	59.5	60.2	65
		3)mice_ S19	experiment 1	cap25	67	45	55
		4)mice_Thy neg	experiment 1	capB	84.6	70.4	84.5
			experiment 2	capF	63	46.8	68.2
		BF							velocity
		mice_name	experiment	capillary	BF_air	BF_water	BF_warm		mice_name	experiment	capillary	velocity_air	velocity_water	velocity_warm
		1)mice_Rav	experiment 1	cap21	57.5021	48.6117	46.0114		1)mice_Rav	experiment 1	cap21	0.609098	0.363631	0.411506
			experiment 2	cap19	30.4106	31.9057	47.1326			experiment 2	cap19	0.718008	0.696746	0.926261
				cap20	33.5681	27.5586	51.7583				cap20	0.960995	0.54679	1.02775
		2)mice_ S18	experiment 1	cap17	43.0675	34.4185	43.6819		2)mice_ S18	experiment 1	cap17	0.976599	0.540978	0.737821
				cap18	59.6819	39.2634	48.9056				cap18	0.863841	0.528434	0.905923
		3)mice_ S19	experiment 1	cap25	24.251	16.7342	17.6055		3)mice_ S19	experiment 1	cap25	0.355661	0.322099	0.273445
		4)mice_Thy neg	experiment 1	capB	74.0953	53.78	71.8196
			experiment 2	capF	29.1574	26.2807	21.6209
