# Supplementary material for: In vivo imaging with a water immersion objective affects brain temperature, blood flow and oxygenation
Source: eLife journal article supplement (doi:10.7554/elife.47324), 2019-08-09
Supplement: supp [file elife-47324-supp-v1.zip › elife_poa_e47324_Figure_3_source_data_2.xlsx]

## Sheet: Figure3_c_anesthesia_glass_wind
	KD
	meanPO2
	mice_name	capillary	experiment	po2_water	po2_warm		velocity
	1)S19	cap1	experiment 1	75	76		mice_name	capillary	experiment	velocity_water	velocity_warm
		cap2		78	82		1)S19	cap1	experiment 1	0.558606	0.74705
		cap5	experiment 2	68	88			cap2		1.20416	1.20766
		cap6		75	99			cap5	experiment 2	0.46711	0.813402
	2)S21	cap3	experiment 1	44	45			cap6		0.550766	0.662557
		cap4		37	39		2)S21	cap3	experiment 1	0.643712	0.95474
		cap7	experiment 2	59	61			cap4		0.667446	1.02604
		cap8		52	56			cap7	experiment 2	0.937687	1.23058
	3)S18	cap9	experiment 1	75	77			cap8		0.51124	0.584273
							3)S18	cap9	experiment 1	0.771683	1.09702
							4)S5	cap11	experiment 1	0.257213	0.421712
								cap12	experiment 2	0.757409	1.09235
								cap1	experiment 3	0.400466	0.487875
								cap2		0.517057	0.885099
							5)VT21	cap13	experiment 1	1.13833	1.37099
							6)S4	cap8	experiment 1	1.30433	2.05041
								cap9		0.303558	0.471618
							7)VT28	cap15	experiment 1	0.277603	0.40536
							8)Thy neg	capB	experiment 1	0.283914	0.3837
	BF
	mice_name	capillary	experiment	BF_water	BF_warm
	1)S19	cap1	experiment 1	37.6369	46.2089
		cap2		82.9268	100.484
		cap5	experiment 2	21.9713	40.6499
		cap6		43.3575	60.9229
	2)S21	cap3	experiment 1	55.828	96.5665
		cap4		44.1532	83.4194
		cap7	experiment 2	69.3283	103.96
		cap8		32.8209	69.6953
	3)S18	cap9	experiment 1	41.0027	75.5647
