# Supplementary material for: In vivo imaging with a water immersion objective affects brain temperature, blood flow and oxygenation
Source: eLife journal article supplement (doi:10.7554/elife.47324), 2019-08-09
Supplement: supp [file elife-47324-supp-v1.zip › elife_poa_e47324_Figure_4_source_data_1.xlsx]

## Sheet: Figure4_thinned_skull
			velocity (mm/s)
mouse with thinned skull window		capillaries	velocity water immersion (mm/s)	velocity heat (mm/s)
mice N1	experiment 1	CAP1	0.21	0.27
	experiment 2	CAP2	0.45	0.53
mice N2	experiment 3	CAP3	0.6	0.85
	experiment 4	CAP4	0.42	0.64
mice N3	experiment 5	CAP6	0.49	0.58
	experiment 6	CAP8	0.83	0.89
mice N5	experiment 7	CAP11	1.03	1.34
	experiment 7	CAP12	0.93	0.97
			Po2 Mean (mm Hg)		Blood Flow (RBCs/s)
mouse with thinned skull window		capillaries	water immersion	heated	water immersion	heated
mice N2	experiment 3	CAP3	27.07	44.09	23.67	40.45
	experiment 4	CAP4	20.53	44.95	26.65	51.98
mice N3	experiment 5	CAP6	42.46	52.78	34.05	43.29
	experiment 6	CAP8	28.55	40.09	66	73.3
mice N5	experiment 7	CAP11	34.75	50.57	25.38	33.83
	experiment 7	CAP12	40.27	56.48	48.15	60.9
